# Supplementary material for: Competing with other polyanionic cathode materials for potassium-ion batteries via fine structure design: new layered KVOPO4 with a tailored particle morphology
Source: Royal Society of Chemistry journal article supplement (doi:10.1039/c9ta03192h), 2019-01-01
Supplement: c9ta03192h1.pdf [file c9ta03192h1.pdf]

## Supporting Information

### **Competing with other polyanionic cathode materials for potassium-ion batteries via fine structure design: A new layered KVOPO<sub>4</sub> with a tailored particle morphology**

Jiaying Liao, Qiao Hu, Bo Che, Xiang Ding, Fei Chen, Chunhua Chen\*

*CAS Key Laboratory of Materials for Energy Conversions, Department of Materials Science and Engineering & Collaborative Innovation Center of Suzhou Nano Science and Technology, University of Science and Technology of China, Hefei 230026, Anhui, China*

**Table S1.** The hydrothermal conditions and results.

| Precursor (in 50 ml H <sub>2</sub> O)                         |                                                                                                                      | Products                                                                                 | Morphology                  |
|---------------------------------------------------------------|----------------------------------------------------------------------------------------------------------------------|------------------------------------------------------------------------------------------|-----------------------------|
| 2mmol VO <sub>2</sub> , 5mmol H <sub>2</sub> SO <sub>4</sub>  | 6mmol KH <sub>2</sub> PO <sub>4</sub>                                                                                | K <sub>0.5</sub> VOPO <sub>4</sub> ·1.5H <sub>2</sub> O                                  | bulk                        |
| 2mmol VO <sub>2</sub> , 5mmol H <sub>2</sub> SO <sub>4</sub>  | 6mmol K <sub>2</sub> HPO <sub>4</sub> ·3H <sub>2</sub> O                                                             | K <sub>0.5</sub> VOPO <sub>4</sub> ·1.5H <sub>2</sub> O                                  | nanosheets                  |
| 2mmol VO <sub>2</sub> , 5mmol H <sub>2</sub> SO <sub>4</sub>  | 3mmol K <sub>2</sub> HPO <sub>4</sub> ·3H <sub>2</sub> O,<br>3mmol K <sub>3</sub> PO <sub>4</sub> ·3H <sub>2</sub> O | K <sub>0.5</sub> VOPO <sub>4</sub> ·1.5H <sub>2</sub> O                                  | flower-like<br>micro-sphere |
| 2mmol VO <sub>2</sub> , 5mmol H <sub>2</sub> SO <sub>4</sub>  | 6mmol K <sub>3</sub> PO <sub>4</sub> ·3H <sub>2</sub> O                                                              | blue gel                                                                                 | -                           |
| 4mmol VO <sub>2</sub> , 10mmol H <sub>2</sub> SO <sub>4</sub> | 12mmol K <sub>2</sub> HPO <sub>4</sub> ·3H <sub>2</sub> O                                                            | K <sub>2</sub> (VO) <sub>2</sub> (HPO <sub>4</sub> ) <sub>3</sub> ·1.125H <sub>2</sub> O | rod                         |

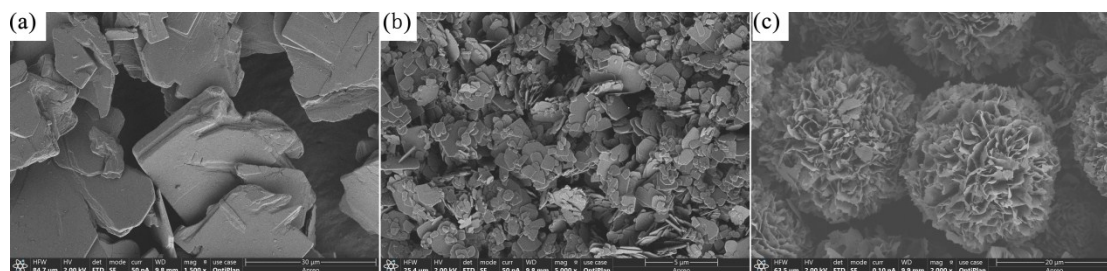

**Fig. S1.** SEM images of hydrothermal products: (a) bulk; (b) nanosheets; (c) micro-sphere.

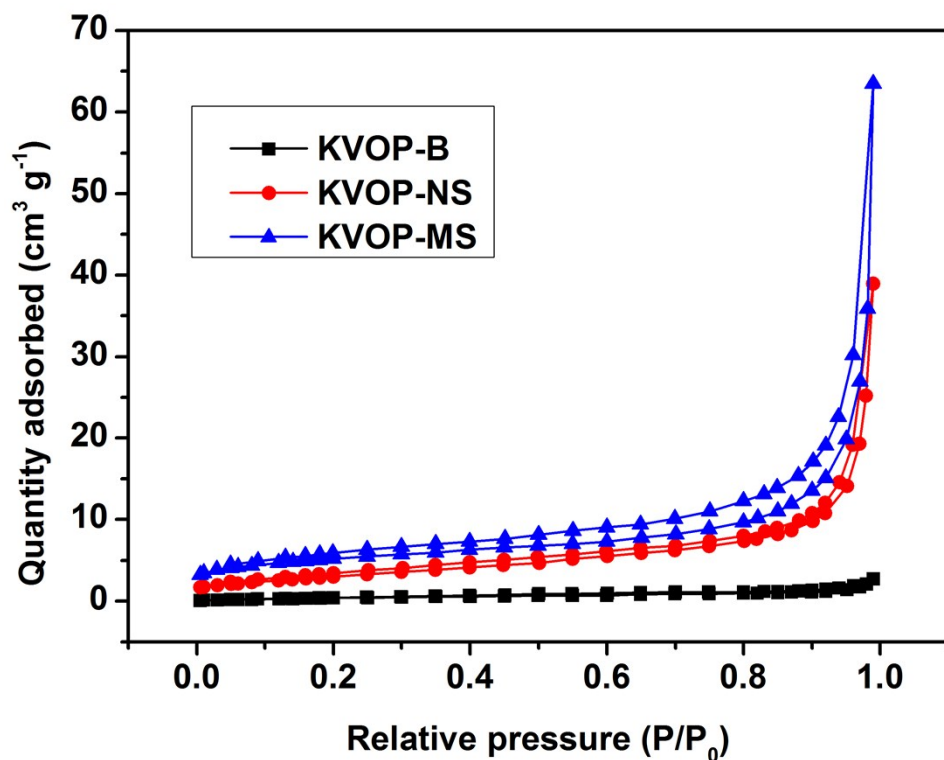

Fig. S2. N<sub>2</sub> adsorption-desorption isotherms KVOP samples.

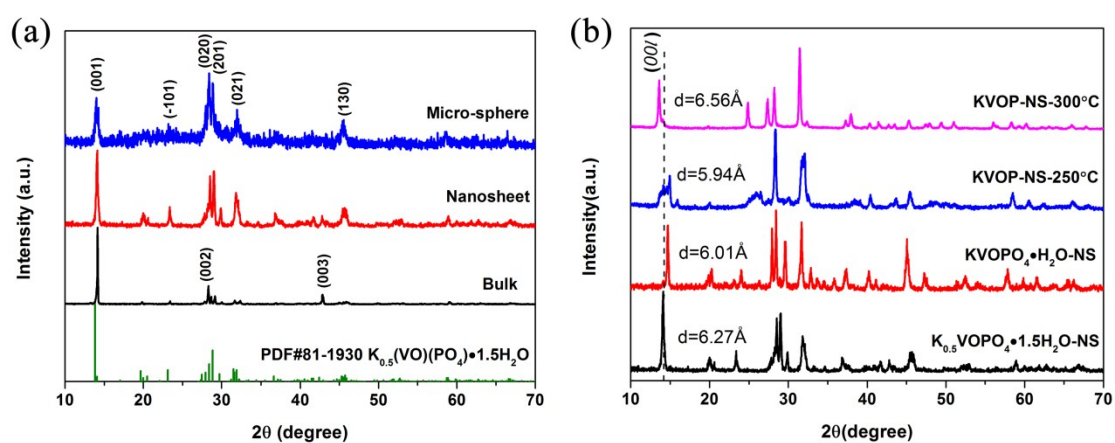

Fig. S3. XRD patterns of hydrothermal products (a) and KVOP-NS at different stages of the synthetic process (b).

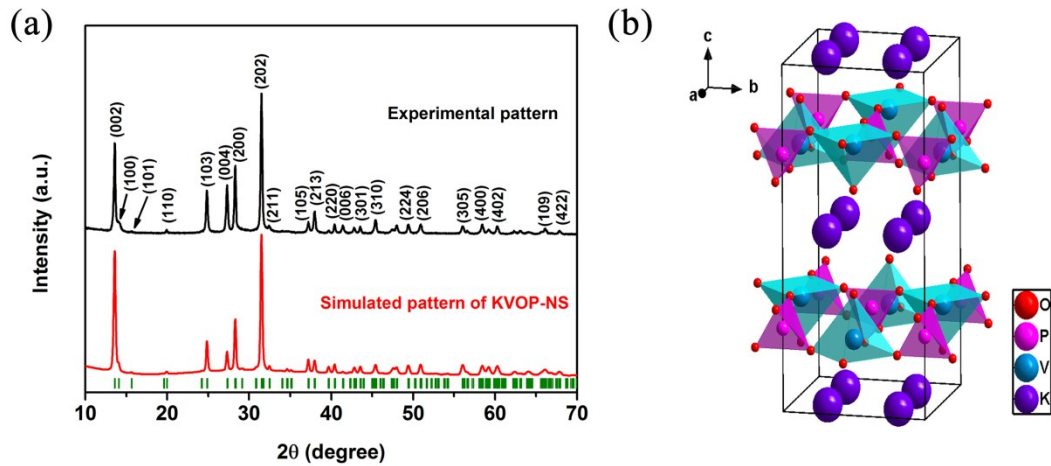

**Fig. S4.** (a) XRD and Rietveld refinement of the KVOP-NS ( $P4_2mc$ ). (b) Representation of  $\alpha_{II}$ -KVPO<sub>4</sub> structure (The K position was not accurately refined due to the large relative errors).

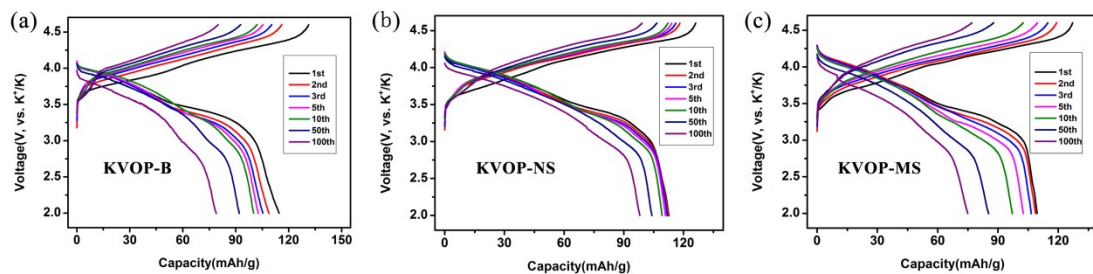

**Fig. S5.** Charge-discharge curves of the selected cycles of KVOP samples in 0.5 M KPF<sub>6</sub>-PC/FEC (1/1, v/v) at a current density of 0.5C (1C=120 mAh/g): (a) KVOP-B; (b) KVOP-NS; (c) KVOP-MS.

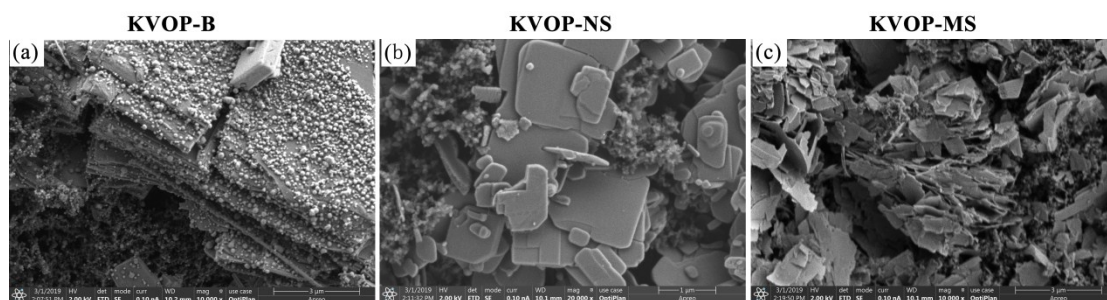

**Fig. S6.** SEM images of KVOP samples after cycling: (a) KVOP-B, (b) KVOP-NS, (c) KVOP-MS.

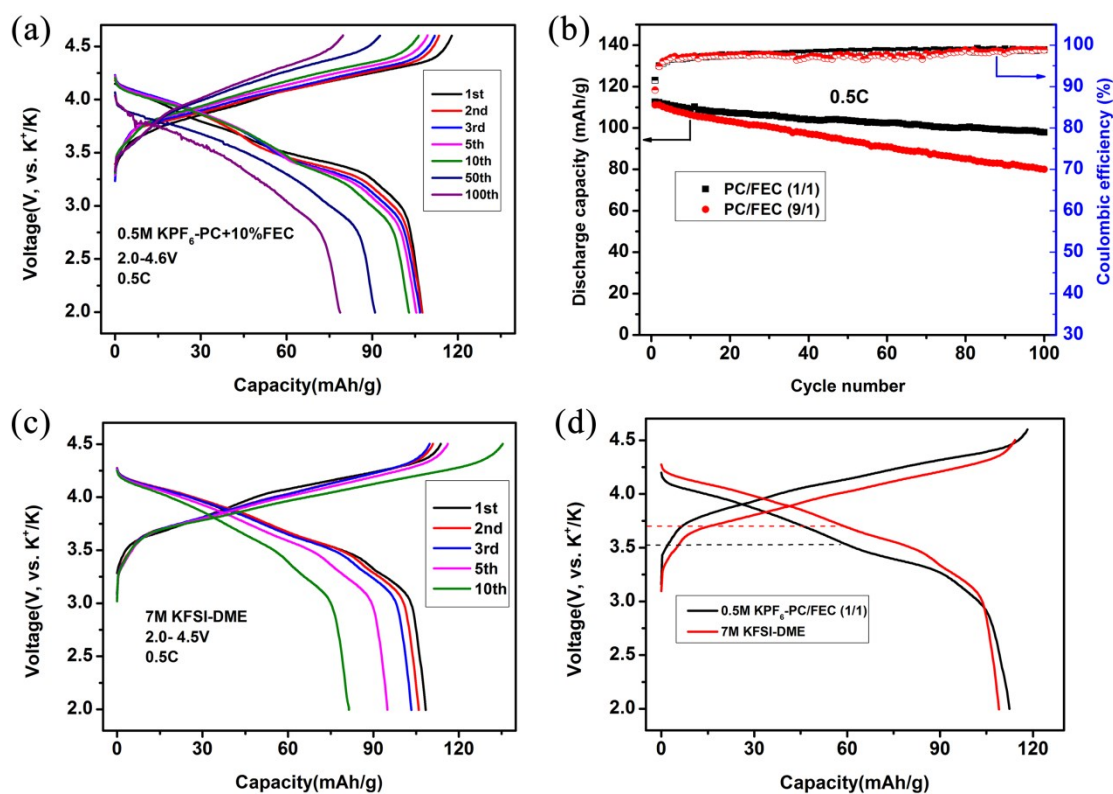

**Fig. S7.** (a) Charge-discharge curves of the selected cycles of KVOP-NS in 0.5 M  $\text{KPF}_6\text{-PC/FEC}$  (9/1, v/v) at a current density of 0.5C; (b) Comparison of cycling performance of KVOP-NS in 0.5 M  $\text{KPF}_6\text{-PC/FEC}$  (1/1) and 0.5 M  $\text{KPF}_6\text{-PC/FEC}$  (9/1); (c) Charge-discharge curves of the selected cycles of KVOP-NS in 7 M KFSI-DME at a current density of 0.5C; (d) Comparison of the initial charge-discharge profiles in 0.5 M  $\text{KPF}_6\text{-PC/FEC}$  (1/1) and 7 M KFSI-DME.

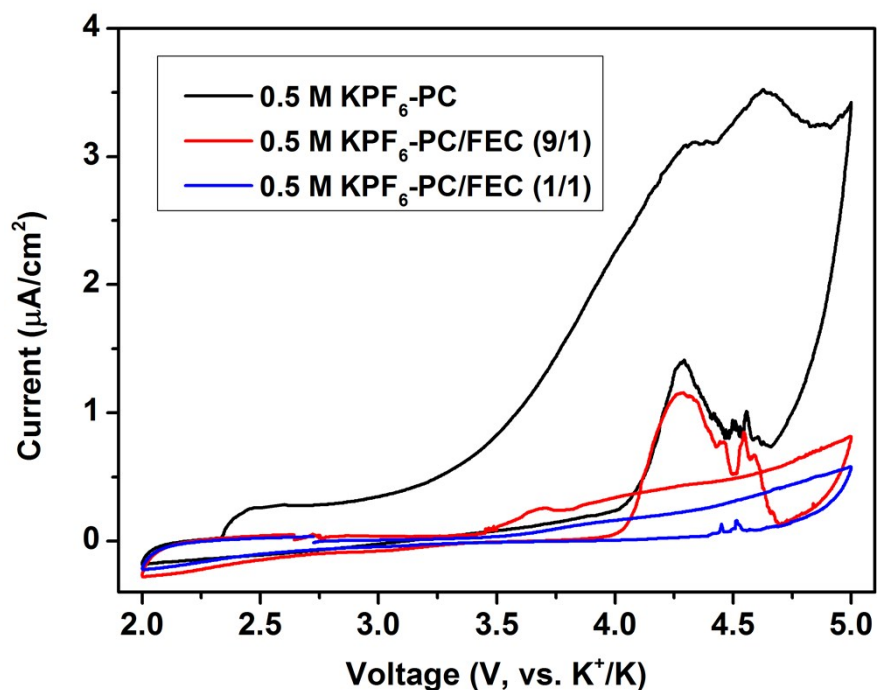

**Fig. S8.** CV curves of potassium half cells using aluminum foil as counter electrode in different electrolytes from 2.0 to 5.0 V at a scan rate of 0.1 mV s<sup>-1</sup>.

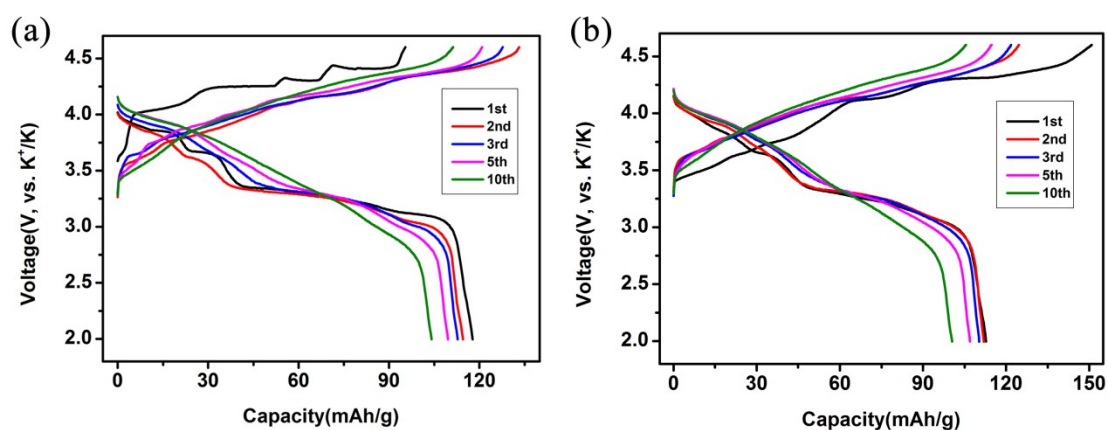

**Fig. S9.** Charge-discharge curves of the selected cycles of K<sub>0.5</sub>VOPO<sub>4</sub>·1.5H<sub>2</sub>O (a) and KVOPO<sub>4</sub>·H<sub>2</sub>O (b) nanosheets in 0.5 M KPF<sub>6</sub>-PC/FEC (1/1, v/v) at a current density of 0.5C.



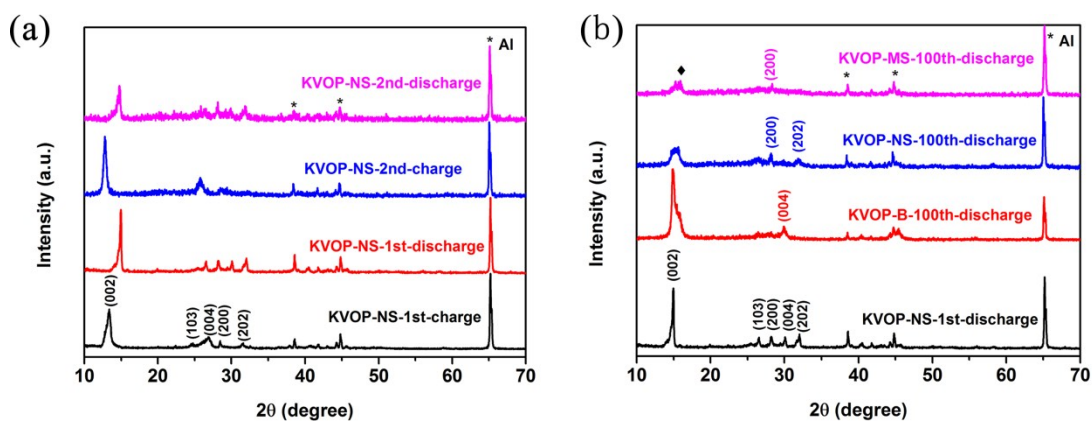

**Fig. S10.** Ex-situ XRD patterns of KVOP-NS after the 1<sup>st</sup> and 2<sup>nd</sup> cycles (a) and KVOP samples after 100 cycles (b).

**Table S2.** The detailed information of electrochemical section of various polyanionic cathodes in PIBs.

| Composition                                                                                        | Electrolyte                               | Current collector | Voltage range | Cycle stability   | Initial CE | References |
|----------------------------------------------------------------------------------------------------|-------------------------------------------|-------------------|---------------|-------------------|------------|------------|
| KVPO <sub>4</sub> F                                                                                | 0.7 M KPF <sub>6</sub> -EC/DEC            | Al                | 3.0-5.0 V     | 75% (30 cycles)   | 73%        | [8]        |
| K <sub>2</sub> [(VO) <sub>2</sub> (HPO <sub>4</sub> ) <sub>2</sub> C <sub>2</sub> O <sub>4</sub> ] | 0.1 M KClO <sub>4</sub> -PC               | Al                | 2.0-4.6 V     | 83% (200 cycles)  | 79%        | [11]       |
| α-KVPO <sub>4</sub>                                                                                | 0.7 M KPF <sub>6</sub> -EC/DEC            | Al                | 2.0-4.8 V     | ~100% (50 cycles) | 46%        | [26]       |
|                                                                                                    | 1 M KPF <sub>6</sub> -PC                  |                   | 2.0-5.0 V     | -                 | 64%        |            |
| KFeSO <sub>4</sub> F                                                                               | 0.1 M KClO <sub>4</sub> -PC               | Al                | 2.0-4.5 V     | -                 | 86%        | [37]       |
| FePO <sub>4</sub>                                                                                  | 1 M KPF <sub>6</sub> -EC/EMC              | Al                | 1.5-3.5 V     | 80% (50 cycles)   | -          | [38]       |
| K <sub>3</sub> V <sub>2</sub> (PO <sub>4</sub> ) <sub>3</sub>                                      | 0.8 M KPF <sub>6</sub> -EC/DEC            | Cu                | 2.5-4.3 V     | 96% (100 cycles)  | 70%        | [39]       |
| KVP <sub>2</sub> O <sub>7</sub>                                                                    | 0.5 M KPF <sub>6</sub> -EC/DEC            | Al                | 2.0-5.0 V     | 83% (100 cycles)  | 71%        | [40]       |
| K <sub>3</sub> V <sub>2</sub> (PO <sub>4</sub> ) <sub>2</sub> F <sub>3</sub>                       | 1 M KPF <sub>6</sub> -EC/PC               | Al                | 2.0-4.6 V     | 97% (100 cycles)  | 73%        | [41]       |
| Layered KVPO <sub>4</sub>                                                                          | 0.5 M KPF <sub>6</sub> -PC/FEC (1/1, v/v) | Al                | 2.0-4.6 V     | 87% (100 cycles)  | 91%        | This work  |
